# Supplementary material
Source: PubMed Central journal article supplement (PMC6259313)
Supplement: supplementary_material4.pdf [file supplementary_material4.pdf]

## SUPPLEMENTARY DATA

### Supplemental Figures

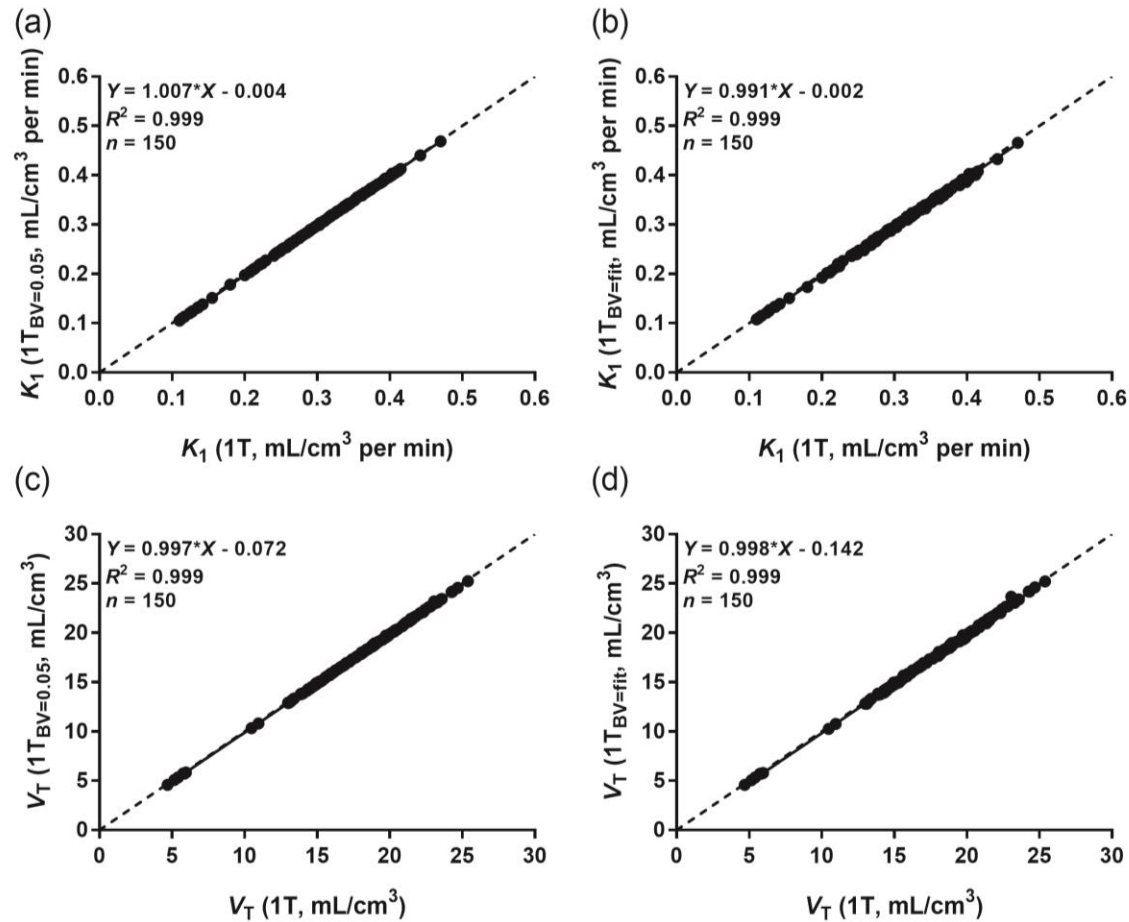

**Supplemental Figure 1.** Correlation between (a and b)  $K_1$  values and (c and d)  $V_T$  values calculated with 1T model using 120 min of PET data time (a and c) without blood volume fraction (1T), and fixed blood volume fraction of 0.05 ( $1T_{BV=0.05}$ ) or (b and d) without blood volume fraction (1T) and with fit of blood volume fraction ( $1T_{BV=fit}$ ).

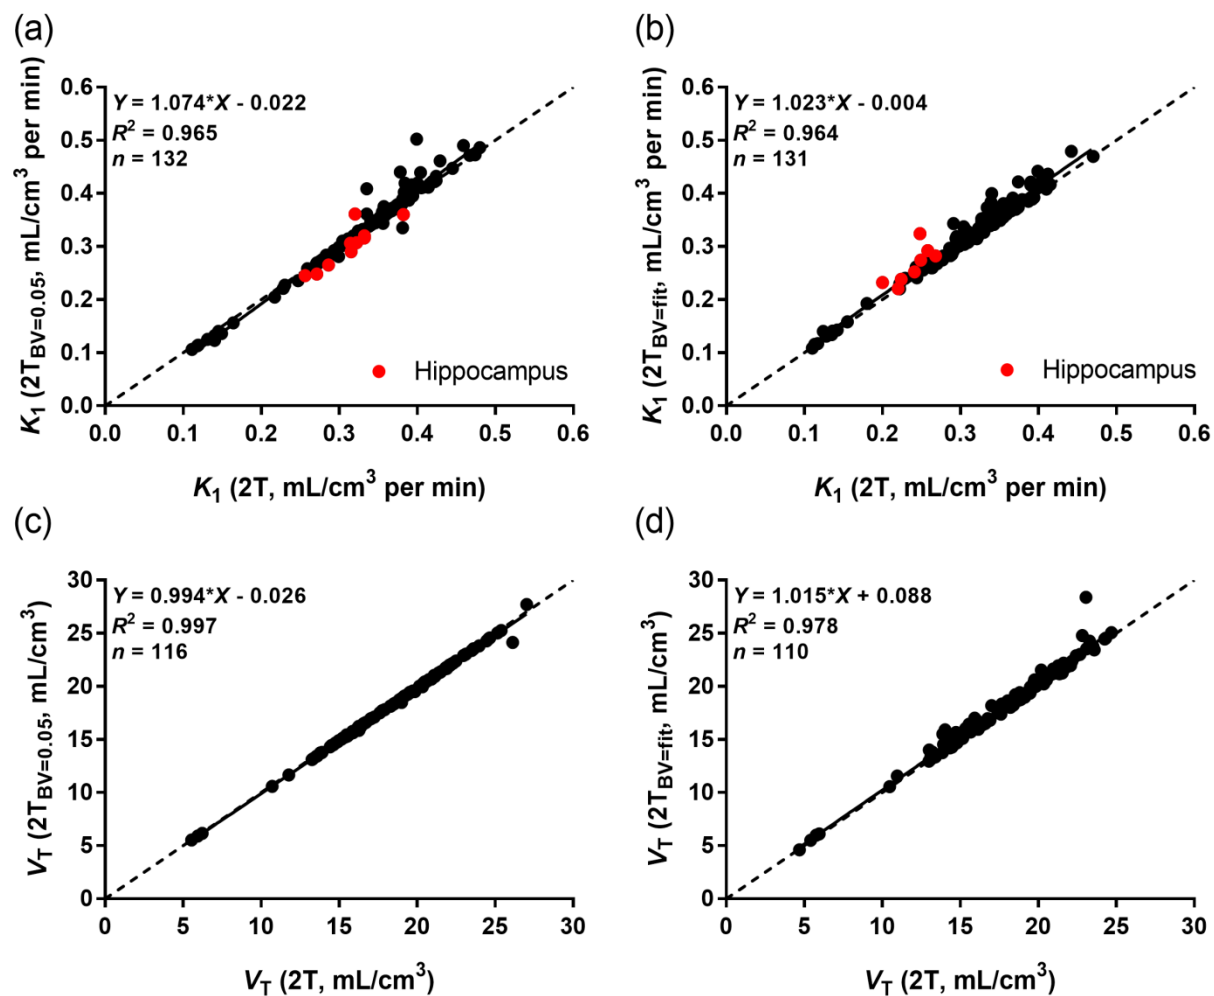

**Supplemental Figure 2.** Correlation between (a and b)  $K_1$  values and (c and d)  $V_T$  values calculated with 2T model using 120 min of PET data time (a and c) without blood volume fraction (2T), and fixed blood volume fraction of 0.05 ( $2T_{BV=0.05}$ ) or (b and d) without blood volume fraction (2T) and with fit of blood volume fraction ( $2T_{BV=fit}$ ).  $K_1$  and  $V_T$  values with relative SE > 25% were excluded from the comparison.

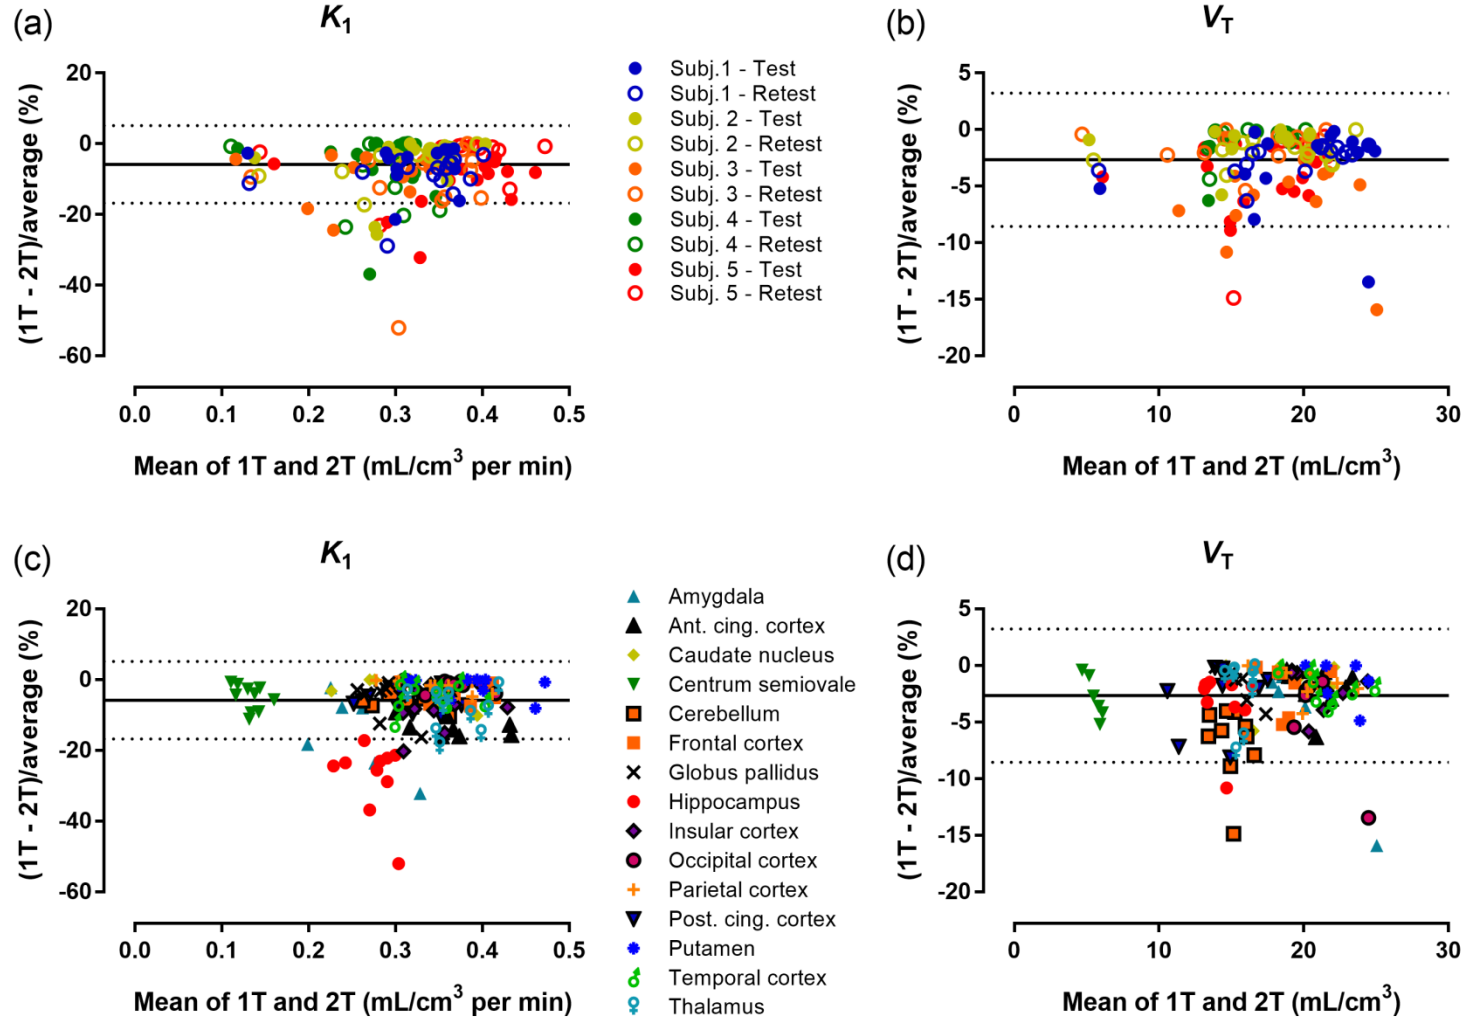

**Supplemental Figure 3.** Bland-Altman plots for  $K_1$  and  $V_T$  values derived by 1T and 2T using 120 min of PET data time. (a)  $K_1$  values and (b)  $V_T$  values color coded by subject and (c)  $K_1$  values and (d)  $V_T$  values color coded by region of interest.  $K_1$  and  $V_T$  values with relative SE > 25% were excluded from the comparison. Solid lines indicate mean value and dotted lines indicate 2 s.d. range.

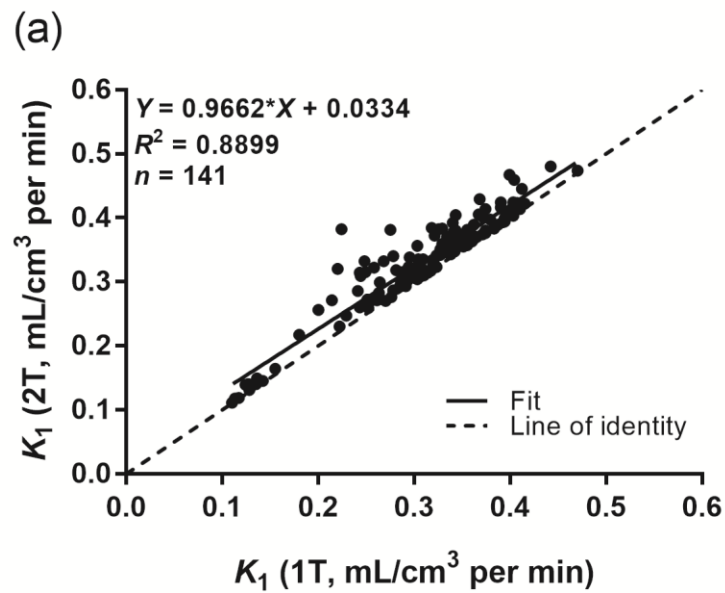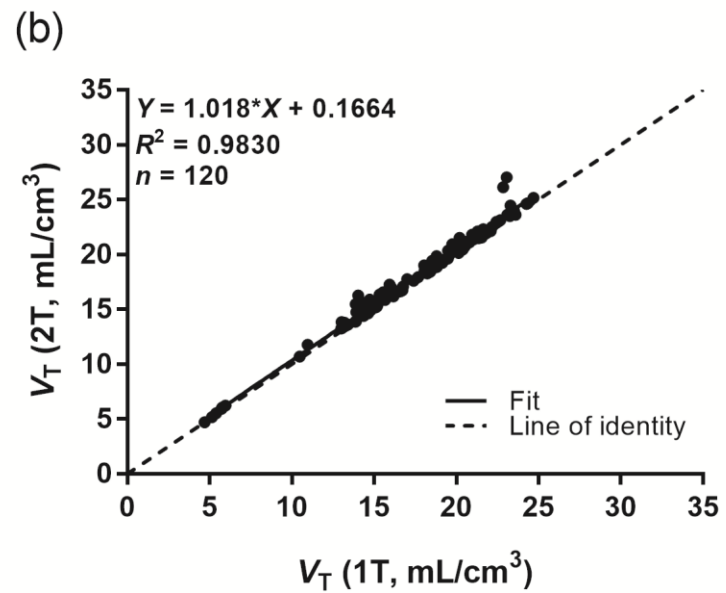

**Supplemental Figure 4.** Correlation between (a)  $K_1$  values and (b)  $V_T$  values calculated with 1T and 2T model using 120 min of PET data time.  $K_1$  and  $V_T$  values with relative SE > 25% were excluded from the comparison.

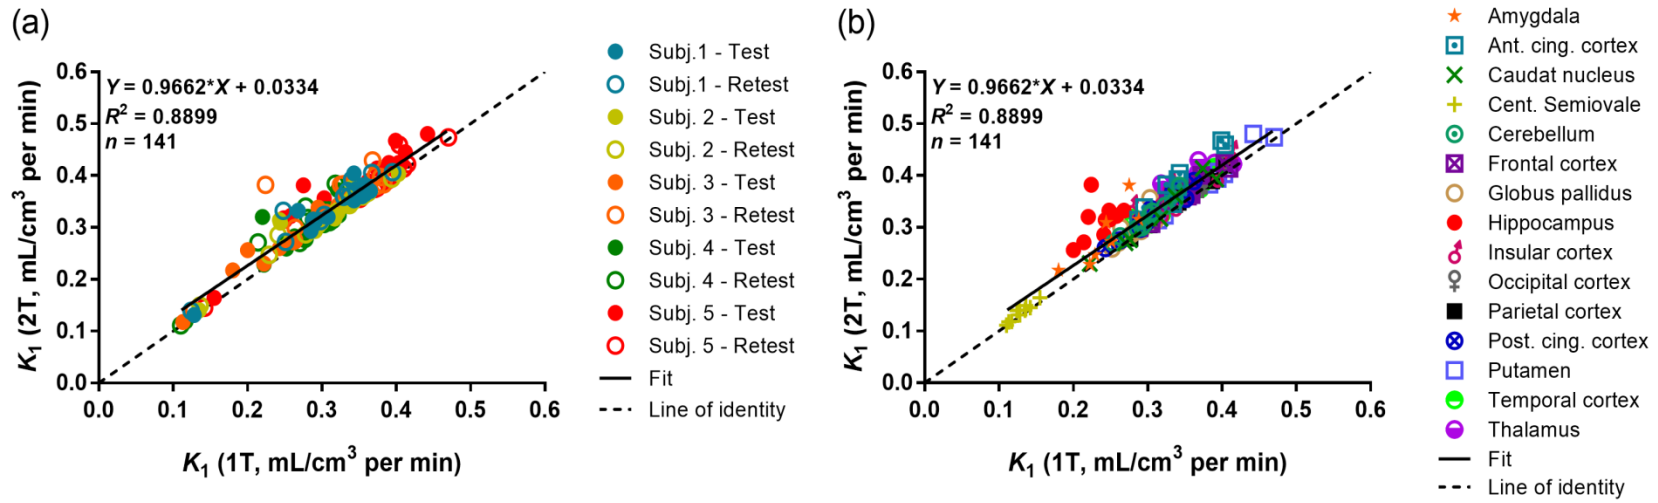

**Supplemental Figure 5.**  $K_1$  values from Supplemental Figure 3 color coded for (a) subject or (b) region of interest.

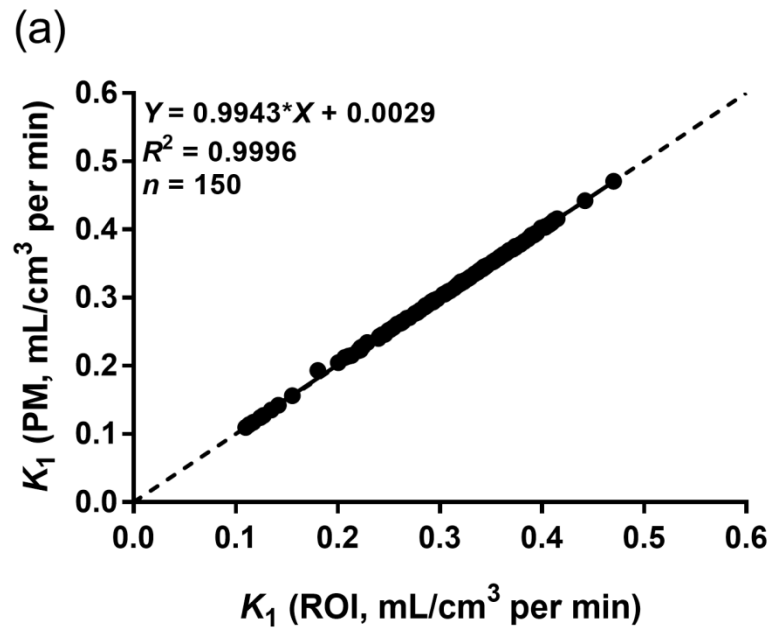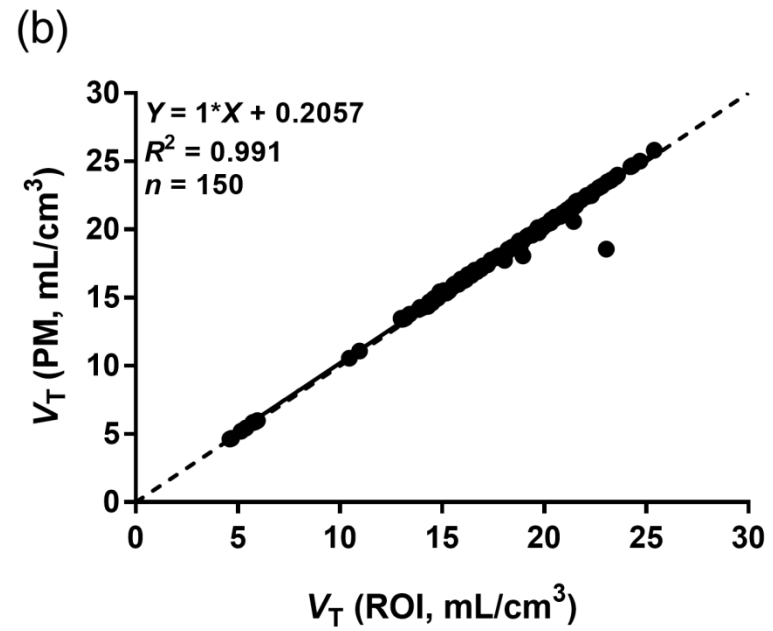

**Supplemental Figure 6.** Correlation between (a)  $K_1$  values and (b)  $V_T$  values calculated from region of interest time activity curves (ROI) or from parametric maps (PM) using 1-tissue compartment model and 120 min of PET data time.

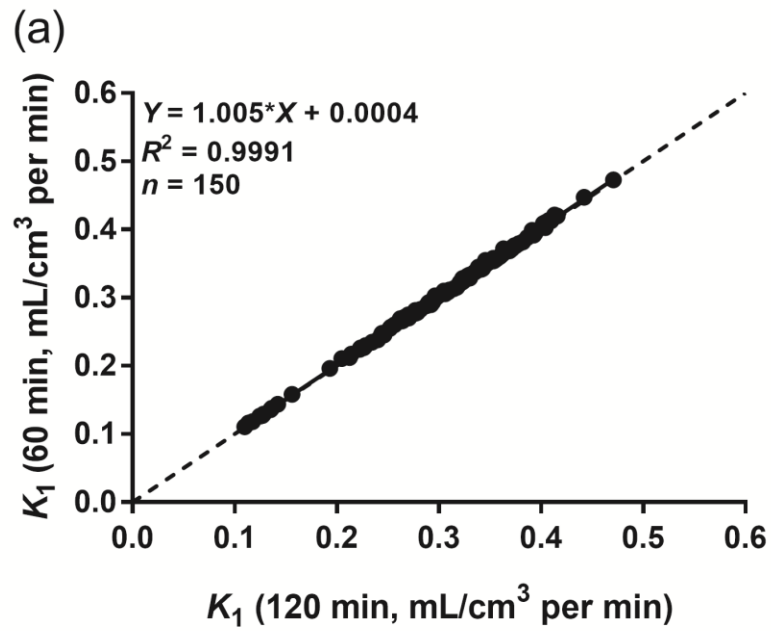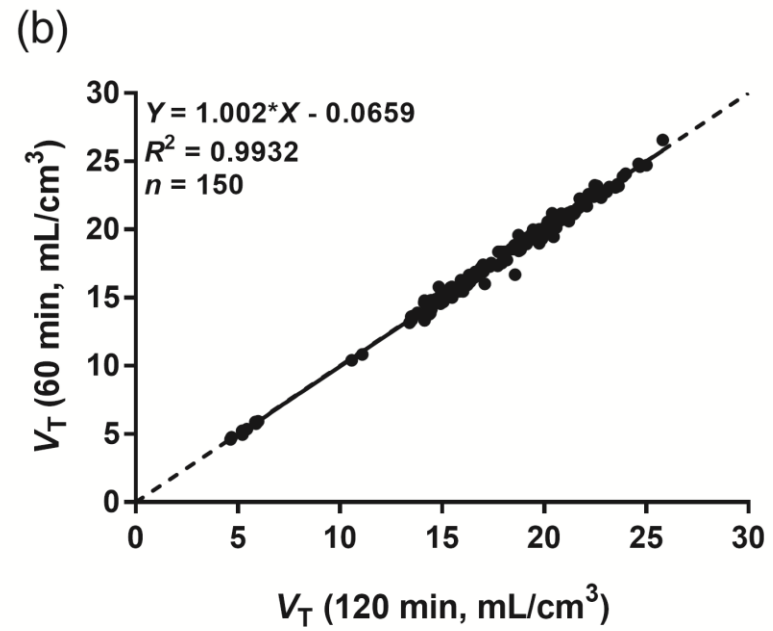

**Supplemental Figure 7.** Correlation between regional (a)  $K_1$  values and (b)  $V_T$  values calculated from parametric maps using 1-tissue compartment model and 120 min or 60 min of PET data time.

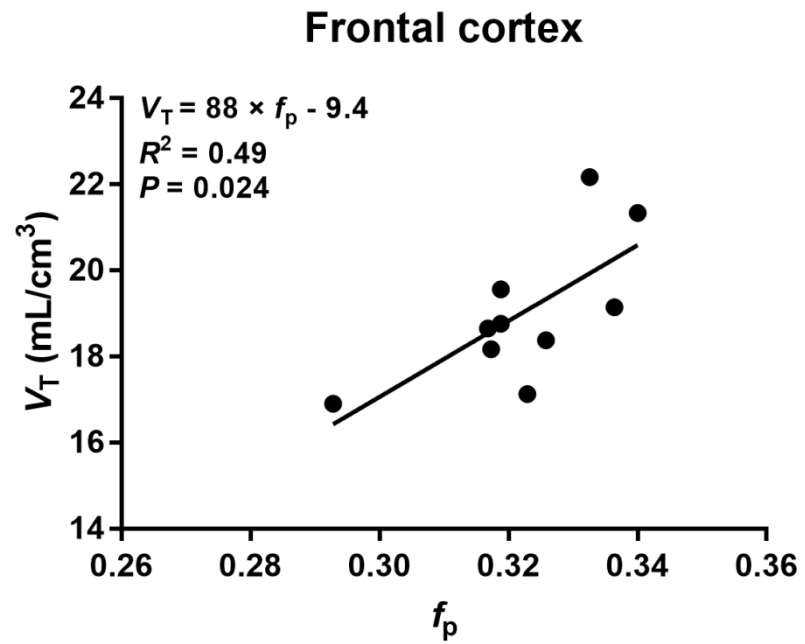

**Supplemental Figure 8.** Linear fit of  $f_p$  and frontal cortex  $V_T$  values. Data are 5 subjects during test and retest condition.



## Supplemental Tables

**Supplemental Table 1.** Results of model selection for curve fitting of 120 min time activity curves

| <i>Region</i>          | <i>Preferred model</i> |     |               |     |
|------------------------|------------------------|-----|---------------|-----|
|                        | <i>AIC</i>             |     | <i>F-test</i> |     |
|                        | 1T                     | 2T  | 1T            | 2T  |
| Putamen                | 6                      | 4   | 6             | 4   |
| Temporal cortex        | 1                      | 9   | 1             | 9   |
| Insular cortex         | 0                      | 10  | 0             | 10  |
| Ant. cingulate cortex  | 0                      | 10  | 0             | 10  |
| Amygdala               | 1                      | 9   | 5             | 5   |
| Parietal cortex        | 1                      | 9   | 2             | 8   |
| Occipital cortex       | 1                      | 9   | 2             | 8   |
| Caudate nucleus        | 7                      | 3   | 7             | 3   |
| Frontal cortex         | 0                      | 10  | 1             | 9   |
| Globus pallidus        | 4                      | 6   | 6             | 4   |
| Thalamus               | 1                      | 9   | 2             | 8   |
| Cerebellum             | 0                      | 10  | 0             | 10  |
| Hippocampus            | 0                      | 10  | 0             | 10  |
| Post. cingulate cortex | 2                      | 8   | 3             | 7   |
| Centrum semiovale      | 1                      | 9   | 5             | 5   |
| Total                  | 25                     | 125 | 40            | 110 |

Abbreviations: AIC = Akaike information criterion; Ant. = anterior; Post. = posterior; 1T = 1-tissue compartment model; 2T = 2-tissue compartment model.

**Supplemental Table 2.** Test-retest reproducibility of kinetic parameters of [<sup>11</sup>C]UCB-J derived with 1-tissue compartment model from 120 min parametric maps

| <i>Region</i>                 | <i>K<sub>1</sub> (mL/cm<sup>3</sup> per min)</i> |            | <i>V<sub>T</sub> (mL/cm<sup>3</sup>)</i> |            | <i>V<sub>T</sub>/f<sub>p</sub> (mL/cm<sup>3</sup>)</i> |            |
|-------------------------------|--------------------------------------------------|------------|------------------------------------------|------------|--------------------------------------------------------|------------|
|                               | <i>aTRV</i>                                      | <i>TRV</i> | <i>aTRV</i>                              | <i>TRV</i> | <i>aTRV</i>                                            | <i>TRV</i> |
| <b>Putamen</b>                | 4%                                               | 2% ± 5%    | 5%                                       | 0% ± 6%    | 7%                                                     | 0% ± 9%    |
| <b>Temporal cortex</b>        | 7%                                               | 2% ± 10%   | 4%                                       | -1% ± 5%   | 6%                                                     | -1% ± 7%   |
| <b>Insular cortex</b>         | 8%                                               | -3% ± 8%   | 5%                                       | -1% ± 6%   | 7%                                                     | -1% ± 8%   |
| <b>Ant. cingulate cortex</b>  | 4%                                               | 0% ± 6%    | 5%                                       | 0% ± 6%    | 5%                                                     | 0% ± 7%    |
| <b>Amygdala</b>               | 8%                                               | -4% ± 9%   | 5%                                       | 0% ± 6%    | 6%                                                     | 0% ± 7%    |
| <b>Parietal cortex</b>        | 5%                                               | -1% ± 7%   | 4%                                       | 0% ± 5%    | 5%                                                     | -1% ± 6%   |
| <b>Occipital cortex</b>       | 8%                                               | -2% ± 11%  | 4%                                       | -1% ± 5%   | 5%                                                     | -2% ± 6%   |
| <b>Caudate nucleus</b>        | 4%                                               | 3% ± 4%    | 4%                                       | -1% ± 6%   | 7%                                                     | -1% ± 9%   |
| <b>Frontal cortex</b>         | 4%                                               | 2% ± 7%    | 3%                                       | 1% ± 4%    | 5%                                                     | 0% ± 6%    |
| <b>Globus pallidus</b>        | 3%                                               | 0% ± 4%    | 8%                                       | -5% ± 8%   | 10%                                                    | -5% ± 10%  |
| <b>Thalamus</b>               | 7%                                               | 7% ± 7%    | 3%                                       | 1% ± 5%    | 6%                                                     | 1% ± 7%    |
| <b>Cerebellum</b>             | 3%                                               | 1% ± 4%    | 2%                                       | 1% ± 3%    | 5%                                                     | 1% ± 7%    |
| <b>Hippocampus</b>            | 5%                                               | -1% ± 7%   | 4%                                       | 0% ± 5%    | 7%                                                     | -1% ± 8%   |
| <b>Post. cingulate cortex</b> | 6%                                               | 3% ± 7%    | 3%                                       | -1% ± 3%   | 6%                                                     | -1% ± 7%   |
| <b>Centrum semiovale</b>      | 6%                                               | -1% ± 8%   | 4%                                       | -2% ± 6%   | 7%                                                     | -2% ± 9%   |

Abbreviations: Ant. = anterior; aTRV = absolute test-retest variability; Post. = posterior; TRV = test-retest variability. Data are mean ± s.d.

**Supplemental Table 3.** Intra-class correlation coefficients of  $K_1$ ,  $V_T$  and  $V_T/f_p$  with different analysis methods using 1-tissue compartment model and 120 min or 60 min of PET data

| Region                 | $K_1$ (mL/cm <sup>3</sup> per min) |      |      |      | $V_T$ (mL/cm <sup>3</sup> ) |      |      |      | $V_T/f_p$ (mL/cm <sup>3</sup> ) |       |       |       |
|------------------------|------------------------------------|------|------|------|-----------------------------|------|------|------|---------------------------------|-------|-------|-------|
|                        | TAC                                |      | PM   |      | TAC                         |      | PM   |      | TAC                             |       | PM    |       |
|                        | 120                                | 60   | 120  | 60   | 120                         | 60   | 120  | 60   | 120                             | 60    | 120   | 60    |
| Putamen                | 0.93                               | 0.95 | 0.93 | 0.79 | 0.80                        | 0.79 | 0.79 | 0.79 | 0.31                            | 0.29  | 0.34  | 0.36  |
| Temporal cortex        | 0.68                               | 0.68 | 0.68 | 0.68 | 0.87                        | 0.85 | 0.88 | 0.88 | 0.56                            | 0.48  | 0.59  | 0.53  |
| Insular cortex         | 0.82                               | 0.84 | 0.82 | 0.84 | 0.73                        | 0.62 | 0.74 | 0.64 | 0.22                            | 0.18  | 0.27  | 0.29  |
| Ant. cingulate cortex  | 0.93                               | 0.95 | 0.93 | 0.95 | 0.81                        | 0.82 | 0.80 | 0.84 | 0.51                            | 0.69  | 0.53  | 0.72  |
| Amygdala               | 0.76                               | 0.80 | 0.78 | 0.78 | -0.18                       | 0.37 | 0.60 | 0.63 | -0.25                           | 0.37  | 0.31  | 0.58  |
| Parietal cortex        | 0.86                               | 0.85 | 0.86 | 0.85 | 0.92                        | 0.92 | 0.92 | 0.92 | 0.79                            | 0.78  | 0.80  | 0.79  |
| Occipital cortex       | 0.16                               | 0.17 | 0.16 | 0.17 | 0.88                        | 0.87 | 0.88 | 0.88 | 0.67                            | 0.63  | 0.69  | 0.66  |
| Caudate nucleus        | 0.98                               | 0.98 | 0.98 | 0.98 | 0.94                        | 0.95 | 0.93 | 0.96 | 0.80                            | 0.80  | 0.80  | 0.81  |
| Frontal cortex         | 0.86                               | 0.88 | 0.87 | 0.89 | 0.92                        | 0.89 | 0.91 | 0.89 | 0.68                            | 0.66  | 0.68  | 0.67  |
| Globus pallidus        | 0.92                               | 0.89 | 0.92 | 0.89 | 0.28                        | 0.33 | 0.23 | 0.40 | -0.42                           | -0.66 | -0.40 | -0.46 |
| Thalamus               | 0.59                               | 0.63 | 0.58 | 0.63 | 0.65                        | 0.62 | 0.63 | 0.67 | 0.14                            | 0.29  | 0.23  | 0.42  |
| Cerebellum             | 0.93                               | 0.91 | 0.93 | 0.91 | 0.92                        | 0.95 | 0.93 | 0.96 | 0.34                            | 0.42  | 0.37  | 0.46  |
| Hippocampus            | 0.78                               | 0.81 | 0.79 | 0.79 | 0.80                        | 0.86 | 0.85 | 0.91 | 0.61                            | 0.76  | 0.68  | 0.82  |
| Post. cingulate cortex | 0.83                               | 0.81 | 0.84 | 0.80 | 0.98                        | 0.96 | 0.98 | 0.95 | 0.91                            | 0.89  | 0.92  | 0.90  |
| Centrum semiovale      | 0.79                               | 0.83 | 0.80 | 0.83 | 0.90                        | 0.97 | 0.89 | 0.97 | 0.62                            | 0.70  | 0.61  | 0.70  |

Abbreviations: Ant. = anterior; PM = parametric map; Post. = posterior; TAC = time activity curve.

**Supplemental Table 4.** Test-retest reproducibility of kinetic parameters of [<sup>11</sup>C]UCB-J derived with 1-tissue compartment model from 60 min time activity curves

| <i>Region</i>          | <i>K<sub>1</sub> (mL/cm<sup>3</sup> per min)</i> |            | <i>V<sub>T</sub> (mL/cm<sup>3</sup>)</i> |            | <i>V<sub>T</sub>/f<sub>p</sub> (mL/cm<sup>3</sup>)</i> |            |
|------------------------|--------------------------------------------------|------------|------------------------------------------|------------|--------------------------------------------------------|------------|
|                        | <i>aTRV</i>                                      | <i>TRV</i> | <i>aTRV</i>                              | <i>TRV</i> | <i>aTRV</i>                                            | <i>TRV</i> |
| Putamen                | 4%                                               | 2% ± 5%    | 5%                                       | 0% ± 6%    | 7%                                                     | 0% ± 9%    |
| Temporal cortex        | 8%                                               | 2% ± 10%   | 4%                                       | -1% ± 5%   | 6%                                                     | -2% ± 7%   |
| Insular cortex         | 8%                                               | -4% ± 8%   | 6%                                       | -1% ± 7%   | 7%                                                     | -1% ± 9%   |
| Ant. cingulate cortex  | 4%                                               | 0% ± 6%    | 4%                                       | 1% ± 5%    | 4%                                                     | 1% ± 5%    |
| Amygdala               | 9%                                               | -4% ± 9%   | 7%                                       | 2% ± 8%    | 9%                                                     | 2% ± 11%   |
| Parietal cortex        | 5%                                               | -1% ± 7%   | 4%                                       | -1% ± 5%   | 5%                                                     | -1% ± 6%   |
| Occipital cortex       | 9%                                               | -2% ± 11%  | 4%                                       | -1% ± 5%   | 5%                                                     | -1% ± 6%   |
| Caudate nucleus        | 4%                                               | 3% ± 3%    | 3%                                       | -1% ± 4%   | 7%                                                     | -1% ± 8%   |
| Frontal cortex         | 4%                                               | 2% ± 6%    | 4%                                       | 1% ± 5%    | 5%                                                     | 1% ± 6%    |
| Globus pallidus        | 4%                                               | -1% ± 4%   | 6%                                       | -1% ± 7%   | 9%                                                     | -1% ± 10%  |
| Thalamus               | 7%                                               | 6% ± 7%    | 4%                                       | 2% ± 5%    | 5%                                                     | 2% ± 7%    |
| Cerebellum             | 4%                                               | 1% ± 5%    | 2%                                       | 1% ± 2%    | 5%                                                     | 1% ± 7%    |
| Hippocampus            | 5%                                               | -2% ± 6%   | 3%                                       | 2% ± 4%    | 5%                                                     | 2% ± 6%    |
| Post. cingulate cortex | 7%                                               | 4% ± 8%    | 4%                                       | -2% ± 5%   | 6%                                                     | -2% ± 7%   |
| Centrum semiovale      | 6%                                               | -1% ± 7%   | 2%                                       | -1% ± 2%   | 6%                                                     | -1% ± 7%   |

Abbreviations: Ant. = anterior; aTRV = absolute test-retest variability; Post. = posterior; TRV = test-retest variability. Data are mean ± s.d.

**Supplemental Table 5.** Test-retest reproducibility of kinetic parameters of [<sup>11</sup>C]UCB-J derived with 1-tissue compartment model from 60 min parametric maps

| <i>Region</i>          | <i>K<sub>1</sub> (mL/cm<sup>3</sup> per min)</i> |            | <i>V<sub>T</sub> (mL/cm<sup>3</sup>)</i> |            | <i>V<sub>T</sub>/f<sub>p</sub> (mL/cm<sup>3</sup>)</i> |            |
|------------------------|--------------------------------------------------|------------|------------------------------------------|------------|--------------------------------------------------------|------------|
|                        | <i>aTRV</i>                                      | <i>TRV</i> | <i>aTRV</i>                              | <i>TRV</i> | <i>aTRV</i>                                            | <i>TRV</i> |
| Putamen                | 4%                                               | 2% ± 4%    | 5%                                       | 0% ± 6%    | 6%                                                     | 0% ± 9%    |
| Temporal cortex        | 8%                                               | 2% ± 10%   | 3%                                       | -1% ± 4%   | 5%                                                     | -2% ± 6%   |
| Insular cortex         | 8%                                               | -4% ± 8%   | 6%                                       | -1% ± 7%   | 6%                                                     | -1% ± 8%   |
| Ant. cingulate cortex  | 4%                                               | -1% ± 6%   | 4%                                       | 1% ± 5%    | 4%                                                     | 1% ± 5%    |
| Amygdala               | 8%                                               | -4% ± 9%   | 5%                                       | 1% ± 6%    | 5%                                                     | 1% ± 7%    |
| Parietal cortex        | 5%                                               | -1% ± 7%   | 4%                                       | -1% ± 5%   | 5%                                                     | -1% ± 6%   |
| Occipital cortex       | 9%                                               | -3% ± 11%  | 4%                                       | -1% ± 5%   | 5%                                                     | -2% ± 6%   |
| Caudate nucleus        | 4%                                               | 3% ± 3%    | 2%                                       | -1% ± 3%   | 6%                                                     | -1% ± 8%   |
| Frontal cortex         | 4%                                               | 2% ± 6%    | 4%                                       | 1% ± 5%    | 8%                                                     | 1% ± 6%    |
| Globus pallidus        | 4%                                               | -1% ± 4%   | 5%                                       | -2% ± 7%   | 9%                                                     | -2% ± 10%  |
| Thalamus               | 7%                                               | 6% ± 7%    | 4%                                       | 1% ± 5%    | 5%                                                     | 1% ± 7%    |
| Cerebellum             | 4%                                               | 1% ± 5%    | 2%                                       | 0% ± 2%    | 5%                                                     | 0% ± 7%    |
| Hippocampus            | 5%                                               | -2% ± 6%   | 2%                                       | 1% ± 3%    | 4%                                                     | 1% ± 6%    |
| Post. cingulate cortex | 7%                                               | 3% ± 8%    | 5%                                       | -2% ± 5%   | 6%                                                     | -3% ± 8%   |
| Centrum semiovale      | 6%                                               | -1% ± 7%   | 3%                                       | -2% ± 2%   | 6%                                                     | -2% ± 7%   |

Abbreviations: Ant. = anterior; aTRV = absolute test-retest variability; Post. = posterior; TRV = test-retest variability. Data are mean ± s.d.

**Supplemental Table 6.** Results of linear fit of  $f_p$  and  $V_T$  values, as shown for frontal cortex in Supplementary Figure 5

| <i>Region</i>          | <i>Equation</i>             | <i>R</i> <sup>2</sup> | <i>P value</i> |
|------------------------|-----------------------------|-----------------------|----------------|
| Putamen                | $V_T = 80 \times f_p - 3.1$ | 0.33                  | 0.081          |
| Temporal cortex        | $V_T = 98 \times f_p - 10$  | 0.48                  | 0.027*         |
| Insular cortex         | $V_T = 74 \times f_p - 2.8$ | 0.35                  | 0.072          |
| Ant. cingulate cortex  | $V_T = 86 \times f_p - 6.9$ | 0.47                  | 0.030*         |
| Amygdala               | $V_T = 34 \times f_p + 8.1$ | 0.16                  | 0.250          |
| Parietal cortex        | $V_T = 123 \times f_p - 20$ | 0.54                  | 0.016*         |
| Occipital cortex       | $V_T = 95 \times f_p - 11$  | 0.44                  | 0.037*         |
| Caudate nucleus        | $V_T = 76 \times f_p - 5.3$ | 0.18                  | 0.225          |
| Frontal cortex         | $V_T = 88 \times f_p - 9.4$ | 0.49                  | 0.024*         |
| Globus pallidus        | $V_T = 33 \times f_p + 4.8$ | 0.17                  | 0.238          |
| Thalamus               | $V_T = 24 \times f_p + 7.9$ | 0.18                  | 0.222          |
| Cerebellum             | $V_T = 46 \times f_p - 0.0$ | 0.36                  | 0.066          |
| Hippocampus            | $V_T = 22 \times f_p + 7.5$ | 0.06                  | 0.508          |
| Post. cingulate cortex | $V_T = 52 \times f_p - 2.4$ | 0.10                  | 0.382          |
| Centrum semiovale      | $V_T = 24 \times f_p - 2.4$ | 0.34                  | 0.078          |
